# Supplementary material for: Closing the Gap in Proteomic Identification of Histoplasma capsulatum: A Case Report and Review of Literature
Source: MDPI journal article supplement (doi:10.3390/jof9101019), 2023-10-15
Supplement: s1 [file s1]

1

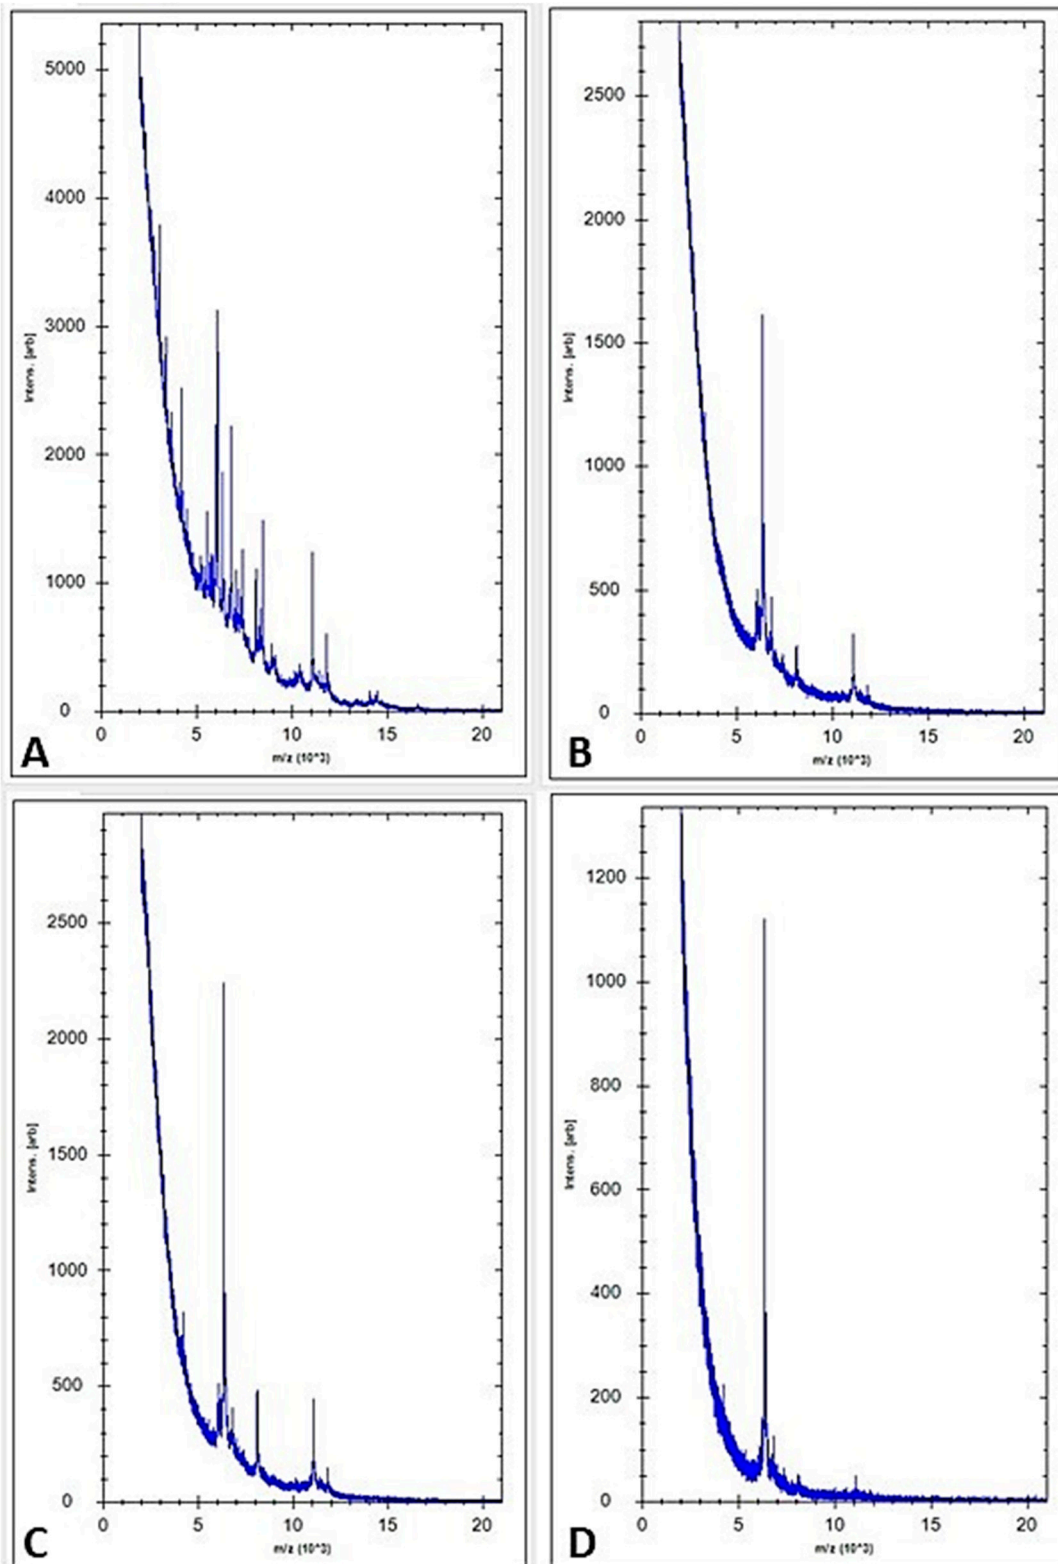

2

3 **Figure S1.** MALDI-TOF spectra analyses from fungal culture on SDA at 25°C. The obtained peaks,  
 4 corresponding to a low log score, show a misidentification of *H. capsulatum* as other fungal  
 5 pathogens and, specifically, with A) *Aspergillus niger* (1.15); B) *Talaromyces rugulosus* (1.05); C)  
 6 *Microsporium audouinii* (1.07) and D) *Chrysosporium shanxiense* (1.14).

7

```

Query 1      TGTGAAACTGTTGAAAGGGAAGCGCTTGCGACCAGAGTCGGCCGCGGGGTTTCAGCGGGC 60
            ||||||| |||||||||||||||||||||||||||||||||||||||| |||||||
Sbjct 929    TGTGAAATTGTTGAAAGGGAAGCGCTTGCGACCAGAGTCGGCCGCGGGGTTTCAGCGGGC 988

Query 61     ATTCGTTGCCCCGTGCAATCCCCCGCGGCCGGGCCAGCGTCGGTTTCGACGGCCGGTCAAA 120
            ||||||||||||||||||||||||||||||||||||||||||||||||||||
Sbjct 989    ATTCGTTGCCCCGTGCAATCCCCCGCGGCCGGGCCAGCGTCGGTTTCGACGGCCGGTCAAA 1048

Query 121    GGCCCCCGGAATGTGTGCGCCTCTCGGGGCGTCTTATAGCCGGGGGTGCAATGCGGCCAGT 180
            ||||||||||||||||||||||||||||||||||||||||||||||||||||
Sbjct 1049   GGCCCCCGGAATGTGTGCGCCTCTCGGGGCGTCTTATAGCCGGGGGTGCAATGCGGCCAGT 1108

Query 181    CGGGACCGAGGAACGCGCTCCGGCACGGACGCTGGCTTAATGGTCGTCAGCGACCCG 237
            ||||||||||||||||||||||||||||||||||||||||||||||||||||
Sbjct 1109   CGGGACCGAGGAACGCGCTCCGGCACGGACGCTGGCTTAATGGTCGTCAGCGACCCG 1165

```

**Figure S2.** Sequencing analysis results by PCR-amplified DNA. Identities 235/237 (99%); gaps 0/237 (0%).

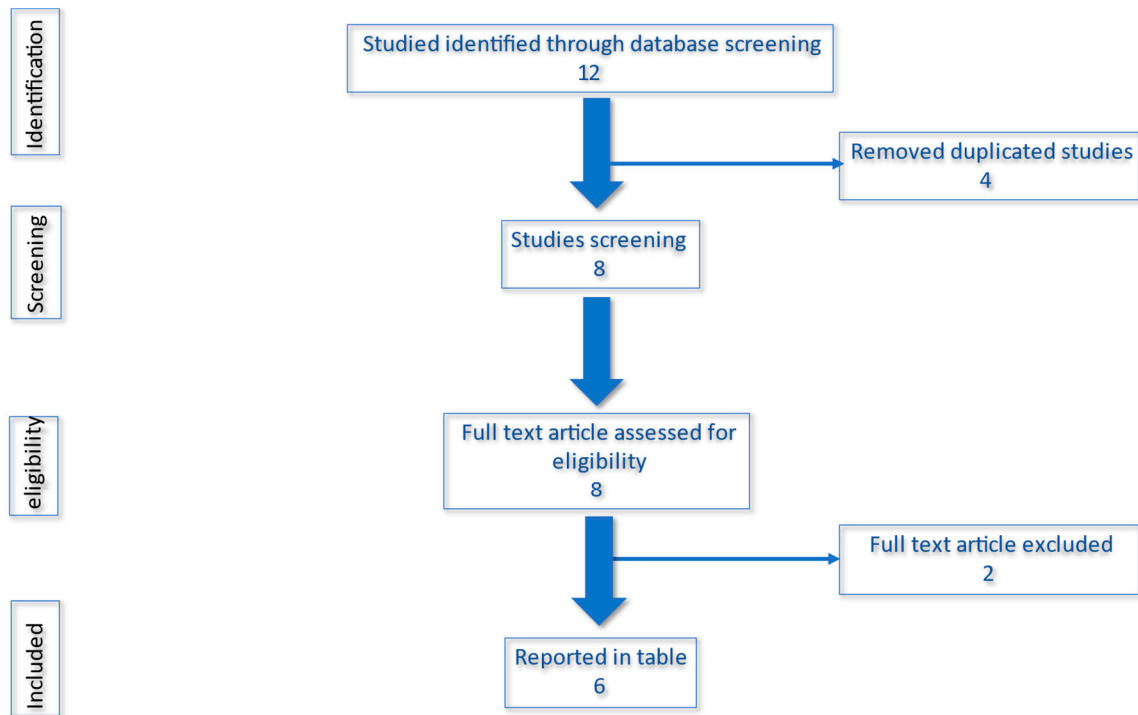

27

28 **Figure S3.** Flow chart reporting the data selection and analysis method used in the systematic review.

29 Twelve articles including the application of MALDI-TOF technology for *H. capsulatum* identification were  
 30 examined. Of these, four were excluded after the application of exclusion criteria (articles discussing  
 31 proteomic methods other than MALDI-TOF and non-English language publications). Among the eight  
 32 remaining publications eligible for analysis, two were excluded after reading the abstract or the full text (did  
 33 not concern cases of identification of *H. capsulatum* by MALDI in human). Six articles were included in the  
 34 study.

35
